# Supplementary material
Source: PubMed Central journal article supplement (PMC11072429)
Supplement: 18_2021_3847_MOESM1_ESM.pdf [file 18_2021_3847_MOESM1_ESM.pdf]

SUPPLEMENTAL INFORMATION

Venom chemistry underlying the painful stings of velvet ants (Hymenoptera: Mutillidae)

Timo Jensen,<sup>1</sup> Andrew A. Walker,<sup>1</sup> Son H. Nguyen,<sup>1</sup> Ai-Hua Jin,<sup>1</sup> Jennifer R. Deuis,<sup>1</sup> Irina Vetter,<sup>1,2</sup> Glenn F. King,<sup>1</sup> Justin O. Schmidt,<sup>3</sup> Samuel D. Robinson<sup>1\*</sup>

<sup>1</sup>Institute for Molecular Bioscience, The University of Queensland, Brisbane QLD 4072, Australia

<sup>2</sup>School of Pharmacy, The University of Queensland, Brisbane QLD 4102, Australia

<sup>3</sup>Southwest Biological Institute, Tucson, AZ 85745, USA.

\*Corresponding author. Email: [sam.robinson@uq.edu.au](mailto:sam.robinson@uq.edu.au) (S.D.R.)

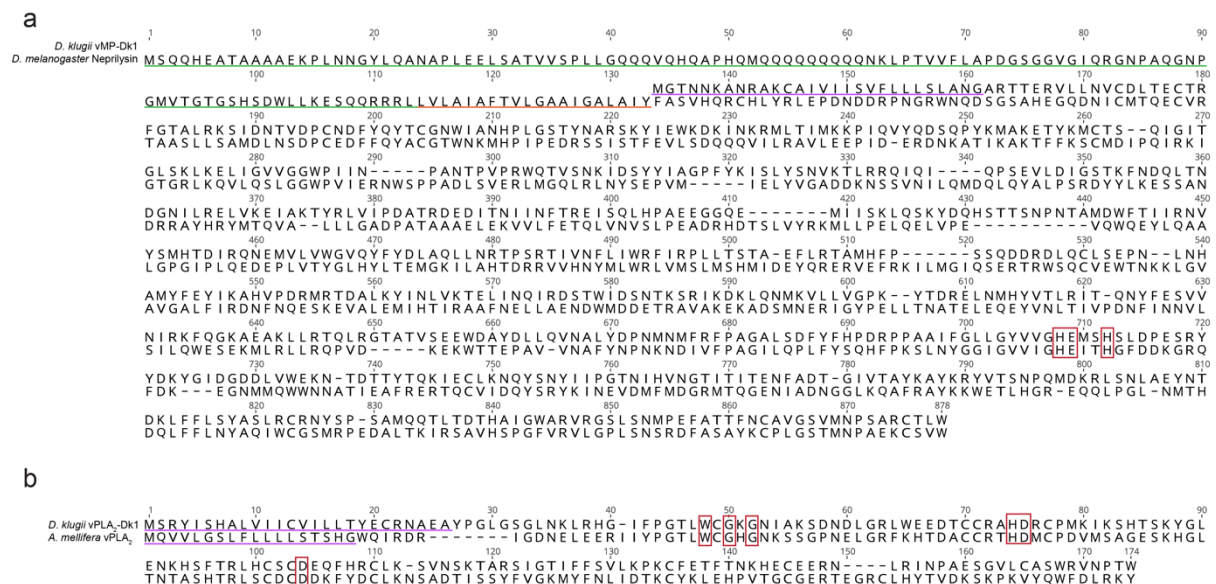

**Fig S1. *D. klugii* venom enzymes.** a) *D. klugii* venom metalloprotease aligned with *D. melanogaster* neprilysin (Q9W436). b) *D. klugii* venom PLA<sub>2</sub> aligned with *Apis mellifera* venom PLA<sub>2</sub> (P00630). Active site residues are boxed in red. The cytoplasmic and transmembrane domains of *D. melanogaster* neprilysin are underlined in green and orange, respectively. Signal peptides are underlined in purple.

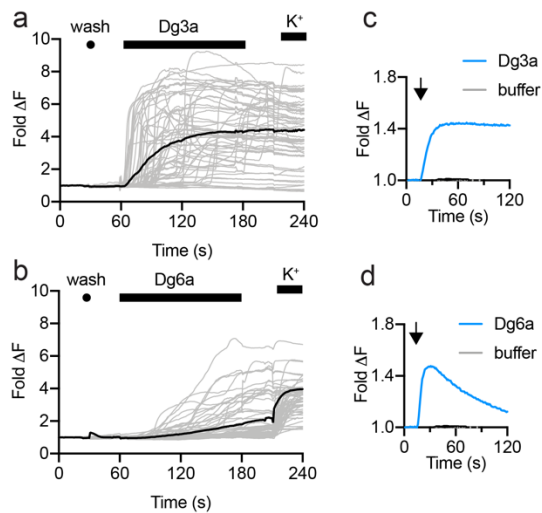

**Fig S2. Defensive peptides of *D. gloriosa* venom.** (a) Application of Dg3a (10  $\mu$ M) to DRG cells produced a rapid, non-cell-specific increase in  $[Ca^{2+}]_i$ . (b) Application of Dg6a (10  $\mu$ M) to DRG cells produced a gradual, non-cell-specific increase in  $[Ca^{2+}]_i$ . Each trace represents the fluorescence of a single cell in the field of view, with the average of all traces displayed in color. (c) Activity of Dg3a (10  $\mu$ M) on F11 cells. (d) Activity of Dg6a (30  $\mu$ M) on F11 cells. Traces corresponding to the change in  $[Ca^{2+}]_i$  and representing the mean of 2–3 experiments, are displayed.

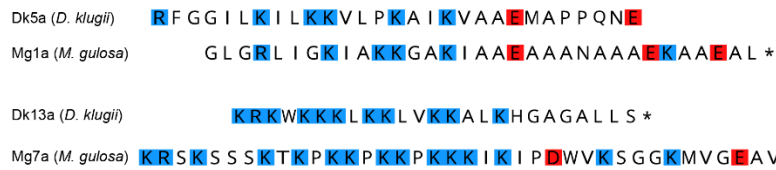

**Fig S3. Defensive venom peptides of *Dasymutilla klugii* (Mutillidae) and *Myrmecia gulosa* (Formicidae).** \*, C-terminal amidation; <sup>^</sup>, O-linked glycosylation. Lysine/arginine and aspartate/glutamate residues are highlighted in blue and red, respectively.

**Table S1: venom components of *D. gloriosa*. TPM, transcripts per million.**

|                                                | TPM                 | Sequence                                                               |
|------------------------------------------------|---------------------|------------------------------------------------------------------------|
| <b>Dg1a</b>                                    | 575499 <sup>†</sup> | IKHRICKRRPNSPWCQ*                                                      |
| <b>Dg2a</b>                                    | 163727              | SRVCNRPNLRWCR*                                                         |
| <b>Dg3a</b>                                    | 44430 <sup>‡</sup>  | KKKKKWRKLLKLLKALKHGAGAVLS*                                             |
| <b>Dg3b<sup>‡</sup></b>                        | 203                 | KKKKKWRKLLKTPQESSEAWSRSS                                               |
| <b>Dg3c<sup>‡</sup></b>                        | 108                 | KKKKKWRKLLKLLKALKHGAGAILSE                                             |
| <b>Dg4a<sup>‡</sup></b>                        | 42811               | LSPAVIASLG*                                                            |
| <b>Dg5a</b>                                    | 9787                | LVGALLGAVELGKLIYDLVKN*                                                 |
| <b>Dg6a</b>                                    | 6590                | GIGGLLKVLGKVPKAVKVA AHLAPSQDE                                          |
| <b>Dg6b</b>                                    | 3946                | GIGGLLKVLGKVLPAIKVA AHLAPPQNE                                          |
| <b>Dg7a</b>                                    | 6460 <sup>†</sup>   | HLGGVLTDLVNKAL*                                                        |
| <b>Dg8a</b>                                    | 6377                | KKGSRFSKLCCKKGGCKIFKNFLKNFGRGAAEAAGGA AVEVA<br>ADEAASE                 |
| <b>Dg8b</b>                                    | 1558                | KKGSIFSCLKCKKGGCKIFKNFLKNFGRGAAEAAGGA AVEVAA<br>DEAASE                 |
| <b>Dg9a<sup>‡</sup></b>                        | 6365                | LTPTRTRPTTPRTSRRFIVRVVPAGRL                                            |
| <b>Dg10a<sup>‡</sup></b>                       | 6317                | KRPPLTPRI*                                                             |
| <b>Dg11a</b>                                   | 5410                | SKPGICKLVPHIPSCR*                                                      |
| <b>Dg11b<sup>‡</sup></b>                       | 1339                | SKPGICKLVPHVPPCR*                                                      |
| <b>Dg11c<sup>‡</sup></b>                       | 1034                | FKPGICKLVPHIPSCR*                                                      |
| <b>Dg12a<sup>‡</sup></b>                       | 2029                | KKGRSRGGGGKRGKKTKNKIVSKIGDMIKDTLNKVGVAAGET<br>AVEKTVEAVKDALQSEEEEEAPSE |
| <b>Dg12b<sup>‡</sup></b>                       | 1390                | KRGRSRGGGGKRGKKTDKIASKIGDMIKDTLNKVGVAAGET<br>AVEKTVEAVKDALQSEEEEEAPSE  |
| <b>Dg12c<sup>‡</sup></b>                       | 581 <sup>†</sup>    | KKGRSRGGGGKRGKKTKNKIASKIGDMIKDTLNKVGVAAGET<br>AVEKTVEAVKDALQSEEEEEAPSE |
| <b>Dg13a<sup>‡</sup></b>                       | 191 <sup>†</sup>    | RRAPPLPY                                                               |
| <b>Dg14a<sup>‡</sup></b>                       | 105 <sup>†</sup>    | LLGGLVKVLAKVLPVVGAINPK                                                 |
| <b>Dg14b</b>                                   | 67                  | LFGGLVKVLAKVLPVVGAINPK                                                 |
| <b>Kunitz domain proteins<sup>‡</sup></b>      | 409                 |                                                                        |
| <b>M13-metalloproteases<sup>‡</sup></b>        | 2826                |                                                                        |
| <b>Phospholipase-A<sub>2</sub><sup>‡</sup></b> | 161                 |                                                                        |
| <b>Hyaluronidase<sup>‡</sup></b>               | 84                  |                                                                        |

\* C-terminal amidation; <sup>†</sup> The TPM value is the sum of more than one assembled transcript encoding the same mature peptide; <sup>‡</sup> Complete primary structure not confirmed by MS/MS.

**Table S2: venom components of *D. bioculata*.** TPM, transcripts per million.

|                                                | <b>TPM</b>          | <b>Sequence</b>                                                                 |
|------------------------------------------------|---------------------|---------------------------------------------------------------------------------|
| <b>Db1a</b>                                    | 360958 <sup>†</sup> | SIPRVCKIKPSLPLCR*                                                               |
| <b>Db1b</b>                                    | 22892               | SIPRICKIKPRLPLCR*                                                               |
| <b>Db2a</b>                                    | 123131              | FLSKYGICKIKPLLQCRRQNW                                                           |
| <b>Db2b</b>                                    | 12167 <sup>†</sup>  | LLSKYGICKIKPWLQCRRQNW                                                           |
| <b>Db3a</b>                                    | 40503               | VFVPDHLMCKVRPYLPWCK*                                                            |
| <b>Db4a</b>                                    | 22112               | SKPGICKLVPHIPPCR*                                                               |
| <b>Db4b<sup>‡</sup></b>                        | 11611               | SKPGICRLMPHIPPCR*                                                               |
| <b>Db5a</b>                                    | 21091               | HAPKRRICKTNPISPLCR*                                                             |
| <b>Db5b<sup>‡</sup></b>                        | 5382                | HAPIRRICKINPMSPLCM*                                                             |
| <b>Db6a</b>                                    | 17026               | SKTSICKLNPMLPMCR*                                                               |
| <b>Db7a</b>                                    | 14126               | RRDGNRVRHDDLEIPDGVYNPQSPGVDVGKRSNDIFMDAAKR<br>ELEAALRQ                          |
| <b>Db8a</b>                                    | 13940               | LFIPRNVICKIRPYLSICK*                                                            |
| <b>Db9a<sup>‡</sup></b>                        | 13780               | KKSKFKGSSGTGGKKSCKDKEPSKMDDILKFVSQ                                              |
| <b>Db10a<sup>‡</sup></b>                       | 12132               | RRAPPLY                                                                         |
| <b>Db11a<sup>‡</sup></b>                       | 11368               | KKRKWKKLKLIRKGLKHGAGALLT*                                                       |
| <b>Db12a</b>                                   | 10398               | HLGGVLTDLVNKAL*                                                                 |
| <b>Db13a</b>                                   | 8913                | KKSKFKGSSDTGGKKSNDKKSSKMDDILKNTLKKVGVAVGKA<br>AGEAAAKTTIEAIKDALQPGEESAEGEAPSE   |
| <b>Db13b</b>                                   | 6117                | KKSKFKGSSGTGGKKSCKDKEPSKMDDILKNTLKKVGVAAAGKA<br>AGEAAAKTTIEAIKDALQPGEESAEGEAPSE |
| <b>Db14a<sup>‡</sup></b>                       | 7670                | RALPRVGGYRVRHDDLAIPDGVYNPQSPGLDVGKLSDDIFIQA<br>ARREFQEA VRQE QREKARRR*          |
| <b>Db14b<sup>‡</sup></b>                       | 3915                | RALPRGGGYRVRHDDLEIPDGVYNPQSPGLDVGKLSDDIFIQAA<br>RREFQEA VRQE QREKARRR*          |
| <b>Db14c<sup>‡</sup></b>                       | 1023                | RALPRGGGYRVRHDDLEIPDGVYNPQSPGLDVGKLSDVVISFTS<br>F                               |
| <b>Db15a<sup>‡</sup></b>                       | 7252                |                                                                                 |
| <b>Db15b<sup>‡</sup></b>                       | 3600                |                                                                                 |
| <b>Db16a<sup>‡</sup></b>                       | 5711                | GPPGRIGAATSFVRASKTTTTKRPTTPKPKPKPKPKS*                                          |
| <b>Db17a<sup>‡</sup></b>                       | 5030                | FPSKHRICKIKPKLPWCR*                                                             |
| <b>Db18a<sup>‡</sup></b>                       | 3118                | LSPAVIASLA*                                                                     |
| <b>Db19a</b>                                   | 2928                | RIGALIRVLRKVIPKAVKVAAHMAPQNEE                                                   |
| <b>Db20a</b>                                   | 2433                | SKRGICKIYPRLSRCRRRMVGNIIAKT                                                     |
| <b>Db21a</b>                                   | 256                 | KRNQELPQCPPGYRRVLGRCRQML                                                        |
| <b>Db22a<sup>‡</sup></b>                       | 152                 | IIGKIKKMIKALKNL*                                                                |
| <b>Kuntiz domain proteins<sup>‡</sup></b>      | 1551                |                                                                                 |
| <b>M13-metalloproteases<sup>‡</sup></b>        | 3123                |                                                                                 |
| <b>Phospholipase-A<sub>2</sub><sup>‡</sup></b> | 61                  |                                                                                 |
| <b>Hyaluronidase<sup>‡</sup></b>               | 29                  |                                                                                 |

\* C-terminal amidation; <sup>†</sup> The TPM value is the sum of more than one assembled transcript encoding the same mature peptide; <sup>‡</sup> Complete primary structure not confirmed by MS/MS.

**Table S3: venom components of *D. sicheliana*. TPM, transcripts per million.**

|                                                 | <b>TPM</b>          | <b>Sequence</b>                                                        |
|-------------------------------------------------|---------------------|------------------------------------------------------------------------|
| <b>Ds1a</b>                                     | 395479 <sup>†</sup> | SKHRICKIKPKLPWCR*                                                      |
| <b>Ds1b</b>                                     | 13306 <sup>†</sup>  | SKRRICKIKPKLPWCR*                                                      |
| <b>Ds2a</b>                                     | 106089 <sup>†</sup> | LSPAVIASLA*                                                            |
| <b>Ds3a</b>                                     | 66353 <sup>†</sup>  | VGPLTPR                                                                |
| <b>Ds3b</b>                                     | 64994 <sup>†</sup>  | AGPLIPRI*                                                              |
| <b>Ds4a</b>                                     | 44253               | VRVKPGICKIMPHIPPCKM                                                    |
| <b>Ds5a</b> <sup>‡</sup>                        | 41625               | EVKADPEPDPQFYPSR*                                                      |
| <b>Ds6a</b> <sup>‡</sup>                        | 20222 <sup>†</sup>  | GLPGRPGAATVFKATKTTTTKRPTKRKS*                                          |
| <b>Ds7a</b>                                     | 18242 <sup>†</sup>  | GISGLVKVLGKVLPKVAKVAAHLAAASQDQQ                                        |
| <b>Ds7b</b> <sup>‡</sup>                        | 2114                | GISGLAKILGKVLPKVAKVAAHLAAASQDQQ                                        |
| <b>Ds8a</b> <sup>‡</sup>                        | 17313 <sup>†</sup>  | KRGYRGGGKRRKQP                                                         |
| <b>Ds9a</b>                                     | 17009 <sup>†</sup>  | RRGRPLPY                                                               |
| <b>Ds10a</b>                                    | 13861               | KRGYRGGGKRRKQPKNKESKIGDAIKNALNEAGAAVGE<br>TVAEKAVEAVKDALQPGEESAEGEAPSE |
| <b>Ds11a</b>                                    | 12944 <sup>†</sup>  | FLGGLVKMLKKVPAAV*                                                      |
| <b>Ds12a</b>                                    | 10949 <sup>†</sup>  | KKRKWRKLLKLLKKGLKHGAGVLLS                                              |
| <b>Ds13a</b>                                    | 10590               | HLGGVLTDLVNRAL*                                                        |
| <b>Ds13b</b>                                    | 2268                | HLGDVLTDLVNRAL*                                                        |
| <b>Ds14a</b>                                    | 7144                | ENPPQKPL                                                               |
| <b>Ds15a</b> <sup>‡</sup>                       | 6136 <sup>†</sup>   | GRRSRGNRGSERIYGGVYNPQSRGVDVGKLSDDIFIQARQE<br>LADALARERAERAKAQRAR       |
| <b>Ds15b</b> <sup>‡</sup>                       | 1154                | GRRSRGNRGSERIYGGVYNPQSRGVDVGRSDDIFIQARQE<br>LADALARERAERAKAQRAR        |
| <b>Ds16a</b>                                    | 5722                | GRRSRGNRGSERIKIYGGVYNPQSRGVDVGKLSDDIFIQARQE<br>FADALARAR               |
| <b>Ds17a</b>                                    | 3945 <sup>†</sup>   | VIKGFKLLKEALKKL*                                                       |
| <b>Ds17b</b> <sup>‡</sup>                       | 3805                | VIKEFKLLKEALKKL*                                                       |
| <b>Ds17c</b>                                    | 2063                | VIKGFKLLKEAMKKL*                                                       |
| <b>Ds18a</b> <sup>‡</sup>                       | 586 <sup>†</sup>    | RTTTSTTIRPRIMVRIPLNRLGPLGRPPAAGA                                       |
| <b>Ds18b</b> <sup>‡</sup>                       | 513                 | RTTTSTTIRPRIMVRIRTIRTSSGRGIK                                           |
| <b>Ds18c</b> <sup>‡</sup>                       | 216                 | RTTTSTTVRPRIMVRIPLNRLGPLGRPPAAGA                                       |
| <b>Ds19a</b> <sup>‡</sup>                       | 489                 |                                                                        |
| <b>Ds20a</b>                                    | 259                 | RDIILLIRRPKKKRHYIKIHKPKIRHIYI                                          |
| <b>Kuntiz domain proteins</b> <sup>‡</sup>      | 9228                |                                                                        |
| <b>M13-metalloproteases</b> <sup>‡</sup>        | 12496               |                                                                        |
| <b>Phospholipase-A<sub>2</sub></b> <sup>‡</sup> | 170                 |                                                                        |
| <b>Hyaluronidase</b> <sup>‡</sup>               | 76                  |                                                                        |

\* C-terminal amidation; <sup>†</sup> The TPM value is the sum of more than one assembled transcript encoding the same mature peptide; <sup>‡</sup> Complete primary structure not confirmed by MS/MS.

**Table S4: venom components of *D. occidentalis*. TPM, transcripts per million.**

|                                                | <b>TPM</b>          | <b>Sequence</b>                                                          |
|------------------------------------------------|---------------------|--------------------------------------------------------------------------|
| <b>Do1a</b>                                    | 165723 <sup>†</sup> | DADTVAALKELIELAKKGLERI*                                                  |
| <b>Do2a<sup>‡</sup></b>                        | 121053 <sup>†</sup> | VFVLPDICNERPHIPQCR*                                                      |
| <b>Do3a</b>                                    | 118842 <sup>†</sup> | VFTKPDICKVKPRFPPCR*                                                      |
| <b>Do3b</b>                                    | 74784               | VFTKPNICKVKPRFPPCR*                                                      |
| <b>Do3c<sup>‡</sup></b>                        | 27559               | VFTKPDICKLRPLLPCW*                                                       |
| <b>Do3d<sup>‡</sup></b>                        | 15025               | VFFTKPDICKVKPLFRPCR*                                                     |
| <b>Do4a</b>                                    | 94692 <sup>†</sup>  | AIYNICKIKPHLPCR*                                                         |
| <b>Do5a<sup>‡</sup></b>                        | 38566               | VFDIPNICKKRPHILRCR*                                                      |
| <b>Do6a</b>                                    | 34292               | LSPAVIASLVG*                                                             |
| <b>Do7a<sup>‡</sup></b>                        | 22025               | LIFEPGICKVKPRLPLCR*                                                      |
| <b>Do8a<sup>‡</sup></b>                        | 18397               | SELRICRTKPRSPLCR*                                                        |
| <b>Do9a</b>                                    | 17031               | SIYNICKIKPRLPCRGRMIGKIF                                                  |
| <b>Do10a<sup>‡</sup></b>                       | 16884               | KRKWRKKLKKLVKALKHAGALLS*                                                 |
| <b>Do11a</b>                                   | 16516               | SKPSICKLVPFIPLCR*                                                        |
| <b>Do11b</b>                                   | 10607               | SKPSICKLVPYIPLCR*                                                        |
| <b>Do11c</b>                                   | 9242                | SKPSICKLMPHIPLCR*                                                        |
| <b>Do11d</b>                                   | 864                 | SKPTICKLVPHIPLCR*                                                        |
| <b>Do12a</b>                                   | 15126               | KRKKRKGSKFGRNILTSFGKGAAEAAGEATVNAAVDQILEA<br>QGEGEY                      |
| <b>Do13a</b>                                   | 14701               | RIGGILKILKKVLPKAIKAAAEMAPPQNE                                            |
| <b>Do14a<sup>‡</sup></b>                       | 9362                | KRGRSRGDGKKGKKPKDKIASKIGDIIKNSLNKFGVVAGETI<br>VEKTVEAVKDALQSGEASAESEAPSE |
| <b>Do15a</b>                                   | 5160                | LVGAALGAVELGELIHHLIKK*                                                   |
| <b>Do16a<sup>‡</sup></b>                       | 3969 <sup>†</sup>   | RRRGFGNENLDKIYGGVINPQSPGVDVGKLPDDIFIQARRE<br>FAEALAREKAERAR*             |
| <b>Do17a</b>                                   | 3341                | HLGDVITDLVNKALNSL*                                                       |
| <b>Do18a</b>                                   | 2640                | RRAPPLPY                                                                 |
| <b>Kuntiz domain proteins<sup>‡</sup></b>      | 840                 |                                                                          |
| <b>M13-metalloproteases<sup>‡</sup></b>        | 684                 |                                                                          |
| <b>Phospholipase-A<sub>2</sub><sup>‡</sup></b> | 483                 |                                                                          |
| <b>Hyaluronidase<sup>‡</sup></b>               | 166                 |                                                                          |

\* C-terminal amidation; <sup>†</sup> The TPM value is the sum of more than one assembled transcript encoding the same mature peptide; <sup>‡</sup> Complete primary structure not confirmed by MS/MS.
